# Supplementary material for: Measurement of surface roughness changes of unpolished and polished enamel following erosion
Source: PLoS One. 2017 Aug 3;12(8):e0182406. doi: 10.1371/journal.pone.0182406 (PMC5542659; doi:10.1371/journal.pone.0182406)
Supplement: S1 File — (XLSX) [file pone.0182406.s001.xlsx]

## Sheet: Sheet1
SDBN1	RDBN1	SDBN4	RDBN4	SDAN1	RDAN1	SDAN4	RDAN4	SDBP1	RDBP1	SDBP4	RDBP4	SDAP1	RDAP1	SDAP4	RDAN4
1.46263	1.60276	1.34137	1.02681	0.373949	0.375135	0.341679	0.324377	0.203045	0.207458	0.183095	0.0471142	0.31509	0.31829	0.305295	0.291214
1.62642	1.59275	1.49356	0.596689	0.311115	0.400875	0.342629	0.338681	0.17412	0.201562	0.159027	0.130499	0.271922	0.319953	0.241715	0.311824
2.78186	1.14588	2.59668	1.21952	0.625025	0.364647	0.442887	0.31328	0.0781529	0.212839	0.0814439	0.143403	0.24487	0.312154	0.25968	0.303437
3.28017	1.29967	5.9211	1.8471	0.345832	0.35514	0.774809	0.313698	0.0403272	0.204706	0.0458606	0.119247	0.267755	0.309963	0.271442	0.302077
0.696518	1.67208	1.24749	1.53318	0.319716	0.292813	0.329586	0.319065	0.0382048	0.18866	0.0475729	0.107695	0.28406	0.309925	0.275721	0.294991
0.783709	1.62503	1.16747	0.756954	0.386113	0.315439	0.305526	0.3228	0.029485	0.169828	0.033657	0.148349	0.275529	0.260178	0.281859	0.299918
0.924366	1.40348	1.29415	0.683318	0.279164	0.319515	0.280899	0.333737	0.0349317	0.17128	0.0382005	0.0543027	0.259415	0.26749	0.271074	0.305764
1.44592	1.82583	1.64609	0.738198	0.390153	0.31381	0.39793	0.357453	0.109378	0.184826	0.106649	0.0619018	0.286091	0.270317	0.233684	0.300342
0.827079	1.78368	1.22768	1.28791	0.455044	0.314	0.421893	0.367325	0.0384817	0.170548	0.0312897	0.0542933	0.262539	0.251701	0.288393	0.308704
1.6776	1.4941	1.06346	1.28771	0.446184	0.523205	0.34107	0.332564	0.0298346	0.0952158	0.0298346	0.038198	0.262218	0.245847	0.252207	0.322276
	2.72074		1.17184		0.68067		0.356662		0.0726341		0.325065		0.244626		0.308267
	2.84055		1.17758		0.51422		0.365341		0.0748368		0.214141		0.243744		0.314737
	2.83941		1.26331		0.733148		0.373395		0.0779042		0.360118		0.234692		0.31466
	2.8614		1.93262		0.673882		0.349269		0.0701738		0.214391		0.255444		0.30335
	2.64721		2.31271		0.339278		0.349868		0.0420777		0.213516		0.272359		0.300731
	3.47324		1.66157		0.335436		0.345629		0.0395973		0.223457		0.267447		0.306866
	3.84649		1.38805		0.362783		0.353317		0.0407411		0.321393		0.260757		0.293712
	3.43145		2.41129		0.319932		0.333763		0.0410475		0.366024		0.271347		0.316249
	2.57085		1.24115		0.320711		0.328859		0.0381726		0.335695		0.266866		0.301479
	3.07882		1.28983		0.318889		0.339174		0.036776		0.0929501		0.294395		0.22993
	0.735673		2.0604		0.311048		0.321772		0.038368		0.0909039		0.289102		0.237993
	0.644876		0.38167		0.328002		0.318862		0.0368762		0.093942		0.272465		0.226296
	0.598719		0.388832		0.444336		0.336369		0.0407253		0.0778506		0.281402		0.238286
	0.800099		1.43889		0.359399		0.33993		0.0382785		0.0798279		0.282934		0.233435
	0.703226		1.5711		0.339635		0.325766		0.0304976		0.196023		0.260846		0.235928
	0.772756		0.393602		0.401083		0.336207		0.0302375		0.200789		0.264784		0.236927
	0.802368		0.361926		0.265769		0.332167		0.0284952		0.205416		0.296768		0.231527
	0.812359		0.39134		0.289956		0.320915		0.0283567		0.205314		0.279718		0.240397
	0.768913		1.44287		0.291308		0.372204		0.0298381		0.199394		0.266448		0.255504
	0.762149		2.14478		0.27473		0.343426		0.0351831		0.160129		0.26339		0.253499
	0.955276		2.0604		0.274056		0.362627		0.0339448		0.163841		0.263648		0.255052
	0.888193		2.18654		0.38063		0.375767		0.0367234		0.187867		0.26405		0.239789
	0.919979		2.05626		0.404959		0.344151		0.0345332		0.181257		0.253554		0.23925
	0.898853		1.4309		0.37778		0.357254		0.0342739		0.182487		0.266835		0.241255
	0.959527		1.62557		0.397242		0.355208		0.105578		0.184727		0.25738		0.240109
	1.41437		1.69563		0.422466		0.357623		0.117684		0.187368		0.254208		0.253081
	1.45059		1.89193		0.505749		0.355252		0.114993		0.164241		0.259237		0.248594
	1.33381		1.88765		0.471653		0.329048		0.0992594		0.160302		0.283372		0.247043
	1.42299		1.81189		0.456238		0.333551		0.036847		0.165917		0.288437		0.250397
	1.60785		2.05692		0.419114		0.288488		0.0381982		0.106181		0.287162		0.235343
	0.863868		2.08567		0.43577		0.44688		0.0377854		0.107865		0.290605		0.273097
	0.819679		2.4139		0.464783		0.578531		0.0410961		0.101396		0.280878		0.257049
	0.838127		1.77887		0.411714		0.867738		0.0298346		0.105653		0.262064		0.267022
	0.812428		1.97204		0.479244		0.976491		0.0299603		0.102018		0.264617		0.270159
	0.801292		2.18913		0.439408		0.524026		0.039761		0.106294		0.265555		0.265516
	1.79027		1.81737				0.295917		0.029596		0.105477		0.260354		0.234097
	1.63917		2.33145				0.312324		0.0299448		0.116105		0.260106		0.241543
	1.62325		2.63768				0.33322				0.109525				0.271122
	1.56479		2.50839				0.412212				0.108527				0.256105
	1.77052		2.70299				0.416073				0.0535065				0.25421
			2.04434				0.403606				0.0546019				0.26741
			2.63816				0.42038				0.0563681				0.259963
			3.9279				0.337773				0.0603694				0.278681
			3.53796				0.334219				0.0535576				0.272706
			4.11424				0.336713				0.0550306				0.265626
			3.34487				0.353819				0.0612369				0.27168
			2.45705				0.36466				0.0542892				0.244225
			2.62951				0.332293				0.0502809				0.248365
			2.30034				0.320356				0.060595				0.268229
			2.28882				0.343479				0.0515472				0.274078
			2.29851				0.334013				0.0494508				0.286698
			2.59668				0.34066				0.0481558				0.277046
			2.10629				0.406067				0.0510783				0.270972
			0.801663				0.507283				0.0525548				0.271677
			3.20018				0.384379				0.0503916				0.269143
			3.06299				0.770715				0.0528174				0.26912
			3.1174				0.768542				0.0513695				0.268384
			3.33958				1.52619				0.0509132				0.273968
			4.93315				1.17923				0.0462226				0.264077
			1.51939				0.937254				0.0481209				0.262453
			1.79509				1.31955				0.0481636				0.273821
			0.666311				1.23288				0.0447579				0.267244
			10.3771				1.16266				0.0460523				0.275268
			11.4661				0.926142				0.0376416				0.268942
			6.81727				1.56503				0.0356962				0.272583
			8.63125				0.320458				0.0329536				0.272246
			10.6888				0.303324				0.0364411				0.28392
			10.6784				0.298659				0.0370236				0.281469
			11.4985				0.306836				0.0368172				0.274407
			6.75277				0.317309				0.0371158				0.267212
			8.72754				0.306654				0.0374546				0.273076
			8.24227				0.325261				0.0368723				0.274736
			0.841009				0.336428				0.0353103				0.267214
			1.44496				0.331784				0.0386728				0.258169
			1.15736				0.330223				0.0345325				0.270147
			1.10017				0.372205				0.0333209				0.262811
			1.80789				0.33325				0.0335047				0.266994
			1.75389				0.328372				0.03507				0.275514
			0.827492				0.334406				0.0803411				0.280841
			1.6747				0.330498				0.0358472				0.28
			1.33099				0.337724				0.0363332				0.272172
			0.654696				0.344718				0.0375079				0.286785
			1.28553				0.367062				0.0328007				0.290835
			1.2229				0.336971				0.0355081				0.286532
			1.19807				0.358093				0.086137				0.284206
			1.16517				0.338998				0.0818993				0.277386
			1.00063				0.337308				0.0876013				0.263842
			1.23639				0.331922				0.0788114				0.29191
			1.61937				0.336517				0.0413141				0.289457
			0.97254				0.356039				0.0361005				0.275994
			0.666861				0.369878				0.0396804				0.262689
			0.70245				0.358812				0.0360912				0.297347
			0.701797				0.437998				0.0384965				0.278228
			0.699988				0.371867				0.0364101				0.30653
			0.695994				0.371538				0.0418879				0.289115
			1.119				0.37478				0.0406935				0.291715
			1.2685				0.3653				0.0424226				0.277299
			1.3				0.374752				0.0420612				0.286002
			1.40202				0.458747				0.0298913				0.286002
			1.40574				0.420595				0.0293112				0.29749
			1.41083				0.411965				0.0296334				0.284974
			1.23859				0.349217				0.0299707				0.285673
			1.62321				0.468889				0.0296917				0.263293
			1.61329				0.243089				0.0274042				0.262535
			1.50468				0.246092				0.0208204				0.272905
			1.12				0.269973				0.0286467				0.274185
			1.04358				0.258359				0.0261986				0.265307
			1.09955				0.251394				0.026414				0.274314
			1.04615				0.259202				0.0311428				0.265743
			0.927274				0.265258				0.0315061				0.283376
			0.794049				0.252861				0.0323377				0.267677
			0.834498				0.241063				0.0322139				0.269693
			0.737974				0.241811				0.0305199				0.266969
			0.779453				0.317885				0.0388715				0.262756
			0.809735				0.298643				0.0399951				0.273805
			1.46709				0.305489				0.0399127				0.268477
			1.72634				0.30585				0.0416634				0.286609
			1.36496				0.292046				0.0414605				0.262803
			1.92121				0.305945				0.0436664				0.259294
			1.52946				0.329098				0.0366292				0.268913
			1.86809				0.317592				0.0380351				0.266265
			1.81685				0.305144				0.0368963				0.263572
			1.88188				0.311184				0.0369752				0.27535
			1.82071				0.356219				0.0368059				0.279521
			1.08103				0.367487				0.0427627				0.276511
			1.03157				0.358353				0.0436907				0.28453
			1.13456				0.375687				0.044857				0.244289
			1.18633				0.36504				0.0440672				0.218802
			0.942351				0.384948				0.0799449				0.22324
			1.92287				0.348315				0.0402842				0.22212
			1.9498				0.355261				0.043769				0.227591
			1.98241				0.358811				0.0382847				0.219157
			2.00947				0.354194				0.0427574				0.24479
			1.95741				0.475098				0.0427295				0.229681
			1.44661				0.367227				0.0769391				0.238831
			1.58092				0.382587				0.0758641				0.238765
			2.22385				0.360932				0.0700177				0.23808
			2.01505				0.357633				0.0816692				0.241079
			1.64683				0.380162				0.144389				0.229682
			1.79104				0.496498				0.150519				0.230561
			1.86493				0.479544				0.161735				0.23288
			1.86265				0.546556				0.162383				0.238571
			0.986629				0.488057				0.149287				0.236472
			0.997765				0.322584				0.164791				0.236685
			0.954005				0.370553				0.153273				0.230244
			1.19102				0.381002				0.154511				0.252159
			1.20619				0.401027				0.145418				0.283892
			1.68877				0.440882				0.154409				0.29852
			1.3636				0.336547				0.0297303				0.283356
			1.50184				0.323965				0.0306359				0.284176
			1.8671				0.344725				0.0306833				0.285926
			1.60883				0.364027				0.0319067				0.282562
			0.902239				0.422991				0.0329167				0.293795
			0.982817				0.551735				0.0346424				0.291654
			1.20291				0.520665				0.0296652				0.290858
			1.77042				0.413922				0.0301401				0.291656
			1.10913				0.39021				0.0293904				0.284269
			0.9338				0.445586				0.0293904				0.291004
			0.937162				0.465012				0.0288869				0.287758
			0.812127				0.425246				0.0289602				0.285356
			1.28425				0.515802				0.0323365				0.279987
			1.25303				0.487386				0.0339378				0.288109
			0.788867				0.471102				0.0331947				0.289362
			1.5891				0.464783				0.0328242				0.288854
			1.59075				0.388764				0.0331609				0.298367
			1.6419				0.346465				0.0325367				0.247683
			1.66162				0.33655				0.0314127				0.266876
			1.75256				0.340729				0.0294428				0.261686
			0.772111				0.342446				0.0324873				0.267319
			0.650019				0.350407				0.0296122				0.259198
			0.628438				0.328706				0.0912425				0.261236
			0.586984				0.356547				0.0371079				0.247885
			0.682582				0.396201				0.0479388				0.24089
			0.613288				0.314204				0.03293				0.253677
			0.802869				0.36796				0.0321168				0.243108
			0.642825				0.336558				0.0327464				0.232678
			1.5043				0.332949				0.0333922				0.243673
			1.22833				0.318998				0.0363013				0.260476
			1.27196				0.333139				0.0339538				0.236804
			1.10803				0.338613				0.0347689				0.250859
			1.09998				0.339081				0.0319371				0.253545
			0.652774				0.289112				0.0387665				0.252999
							0.322907				0.037666				0.25843
											0.0395052				0.260879
											0.0318566				0.244235
