# Supplementary material for: Measurement of surface roughness changes of unpolished and polished enamel following erosion
Source: PLoS One. 2017 Aug 3;12(8):e0182406. doi: 10.1371/journal.pone.0182406 (PMC5542659; doi:10.1371/journal.pone.0182406)
Supplement: S2 File — (XLSX) [file pone.0182406.s002.xlsx]

## Sheet:  1 cluster before
number of sample	Sa roughness µm
1	0.203045
2	0.17412
3	0.0781529
4	0.0403272
5	0.0382048
6	0.029485
7	0.0349317
8	0.109378
9	0.0384817
10	0.0298346

## Sheet: 4 clusters before
number of sample	Sa roughness µm
1	0.183095
2	0.159027
3	0.0814439
4	0.0458606
5	0.0475729
6	0.033657
7	0.0382005
8	0.106649
9	0.0312897
10	0.0298346

## Sheet: 1 cluster after
number of sample	Sa roughness µm
1	0.31509
2	0.271922
3	0.24487
4	0.267755
5	0.28406
6	0.275529
7	0.259415
8	0.286091
9	0.262539
10	0.262218

## Sheet: 4 clusters after
number of sample	Sa roughness µm
1	0.305295
2	0.241715
3	0.25968
4	0.271442
5	0.275721
6	0.281859
7	0.271074
8	0.233684
9	0.288393
10	0.252207
