# Supplementary material for: Measurement of surface roughness changes of unpolished and polished enamel following erosion
Source: PLoS One. 2017 Aug 3;12(8):e0182406. doi: 10.1371/journal.pone.0182406 (PMC5542659; doi:10.1371/journal.pone.0182406)
Supplement: S3 File — (XLSX) [file pone.0182406.s003.xlsx]

## Sheet: 1 cluster before
Sample number	Sa roughness µm
1	1.46263
2	1.62642
3	2.78186
4	3.28017
5	0.696518
6	0.783709
7	0.924366
8	1.44592
9	0.827079
10	1.6776

## Sheet: 4 clusters before
Sample number	Sa roughness µm
1	1.34137
2	1.49356
3	2.59668
4	5.9211
5	1.24749
6	1.16747
7	1.29415
8	1.64609
9	1.22768
10	1.06346

## Sheet: 1 cluster after
Sample number	Sa roughness µm
1	0.373949
2	0.311115
3	0.625025
4	0.345832
5	0.319716
6	0.386113
7	0.279164
8	0.390153
9	0.455044
10	0.446184

## Sheet: 4 clusters after
Sample number	Sa roughness µm
1	0.341679
2	0.342629
3	0.442887
4	0.774809
5	0.329586
6	0.305526
7	0.280899
8	0.39793
9	0.421893
10	0.34107
